# Supplementary material
Source: Elsevier journal article supplement (https://www.sciencedirect.com/science/article/pii/S2531137918300130)
Supplement: mmc1 [file S2531137918300130:mmc1.docx]

| Supplemental material: Reticulocyte enrichment by continuous density gradient from red blood cell units stored in AS-1 | | | | |
| --- | --- | --- | --- | --- |
| Week | Reticulocytes (%) | | | Yield |
|  | Red blood cell units | | Enriched fraction |
| 0.5 | RET | 0.39 ± 0.06 | 5.3 ± 3.5 | 14.3 ± 3.1 |
| HFR | 6.6 ± 1.2 | 9.6 ± 1.6 |  |
| MFR | 9.7 ± 4.2 | 17.6 ± 6.5 |  |
| LFR | 83.7 ± 11.8 | 72. 8 ± 16.0 |  |
| 2.0 | RET | 0.24 ± 0.14 | 4.26 ± 1.15 | 17.8 ± 5.3 |
| HFR | 2.1 ± 1.2 | 12.9 ± 5.3 |  |
| MFR | 15.0 ± 1.5 | 18.5 ± 8.1 |  |
| LFR | 83.0 ± 10.4 | 68.6 ± 27.6 |  |
| 4.0 | RET | 0.16 ± 0.04 | 3.33 ± 2.22 | 20.8 ± 17.3 |
| HFR | 2.0 ± 0.5 | 1.1 ± 0.5 |  |
| MFR | 7.0 ± 1.6 | 19.3 ± 1.5 |  |
| LFR | 91.2 ± 3.5 | 79.6 ± 7.8 |  |
| 6.0 | RET | 0.12 ± 0.04 | 3.67 ± 1.96 | 30.2 ± 19.5 |
| HFR | 0.4 ± 1.2 | 0.0 ± 0.0 |  |
| MFR | 7.0 ± 2.9 | 7.1 ± 1.2 |  |
| LFR | 92.6 ± 7.0 | 92.9 ± 6.2 |  |
| RET: reticulocytes expressed as the percentage of total RBCs; HFR: high fluorescence reticulocytes; MFR: medium fluorescence reticulocytes; LFR: low fluorescence reticulocytes;  Subtypes (HFR, MFR and LFR) are expressed as the percentage of total reticulocytes. The results are presented as the mean ± 1 standard deviation from six independent assays. | | | | |
